# Supplementary material
Source: ML conference proceedings conference paper supplement (https://proceedings.mlr.press/v119/djuric20a.html)
Supplement: Supplementary file [file djuric20a-supp.pdf]

---

## Growing Adaptive Multi-Hyperplane Machines (APPENDIX)

---

**Theorem 2.** Let  $\mathbf{W}^*$  be the solution of (6), and  $T$  be the total number of training iterations. Further, let the pruning be performed as described above,  $p$  be a starting probability of weight duplication, and  $0 < \beta < 1$  is a multiplicative factor that reduces  $p$  after every weight duplication. Then,

$$\frac{1}{T} \sum_{t=1}^T (\mathcal{L}^{(t)}(\mathbf{W}^{(t)}|\mathbf{z}) - \mathcal{L}^{(t)}(\mathbf{W}^*|\mathbf{z})) \leq \frac{(2+c)^2(2+p/(1-\beta))}{\lambda} + \frac{(2+c)^2(2+p/(1-\beta))^2}{2T\lambda} \left( \frac{p(2\beta+3)}{(1-\beta)^2} + \ln(T) + 1 \right). \quad (1)$$

*Proof.* The proof closely follows the proof of Theorems 1 and 3 from (Wang et al., 2011). First, we rewrite the update rule of SGD with the pruning step as  $\mathbf{W}^{(t+1)} \leftarrow \mathbf{W}^{(t)} - \eta^{(t)} \boldsymbol{\vartheta}^{(t)}$ , where  $\boldsymbol{\vartheta}^{(t)} = \nabla^{(t)} + \mathbf{E}^{(t)}$ , and  $\mathbf{E}^{(t)} = \mathbf{E}_{prune}^{(t)} + \mathbf{E}_{dupl}^{(t)}$  where we can see that the weight matrix degradation at the  $t^{\text{th}}$  training iteration  $\mathbf{E}^{(t)}$  is equal to the sum of weight matrix degradation  $\mathbf{E}_{prune}^{(t)}$  due to pruning and weight matrix degradation  $\mathbf{E}_{dupl}^{(t)}$  due to weight duplication. Clearly,  $\mathbf{E}_{prune}^{(t)} = \mathbf{0}$  if no pruning is used, and  $\mathbf{E}_{dupl}^{(t)} = \mathbf{0}$  if no duplication is used at the  $t^{\text{th}}$  training iteration. Note that, in contrast to (Wang et al., 2011), we also included the weight duplication degradation. The relative progress towards the optimal solution  $\mathbf{W}^*$  at the  $t^{\text{th}}$  round  $D^{(t)}$  can be lower bounded as

$$\begin{aligned} D^{(t)} &= \|\mathbf{W}^{(t)} - \mathbf{W}^*\|^2 - \|\mathbf{W}^{(t)} - \eta^{(t)} \nabla^{(t)} - \eta^{(t)} \mathbf{E}^{(t)} - \mathbf{W}^*\|^2 \\ &= -(\eta^{(t)})^2 \|\boldsymbol{\vartheta}^{(t)}\|^2 + 2\eta^{(t)} \|(\mathbf{E}^{(t)})^T (\mathbf{W}^{(t)} - \mathbf{W}^*)\| + 2\eta^{(t)} \|(\nabla^{(t)})^T (\mathbf{W}^{(t)} - \mathbf{W}^*)\| \\ &\geq_1 -(\eta^{(t)})^2 \|\boldsymbol{\vartheta}^{(t)}\|^2 - 2\eta^{(t)} \|\mathbf{E}^{(t)}\| \frac{(2+c)(1+h) + 2}{\lambda} \\ &\quad + 2\eta^{(t)} \left( \mathcal{L}^{(t)}(\mathbf{W}^{(t)}) - \mathcal{L}^{(t)}(\mathbf{W}^*) + \frac{\lambda}{2} \|\mathbf{W}^{(t)} - \mathbf{W}^*\|^2 \right), \end{aligned} \quad (2)$$

where  $h = p/(1-\beta)$ . For the second term in the r.h.s. of the inequality in (2), we first bounded  $\|\mathbf{W}^{(t)}\|$  as

$$\begin{aligned} \|\mathbf{W}^{(t)}\| &\leq \|(1 - \eta^{(t-1)}\lambda) \mathbf{W}^{(t-1)}\| + 2\eta^{(t-1)} + \|\Delta_{prune} \mathbf{W}^{(t-1)}\| + \|\Delta_{dupl} \mathbf{W}^{(t-1)}\| \\ &\leq \frac{t-2}{t-1} \|\mathbf{W}^{(t-1)}\| + \frac{2}{(t-1)\lambda} + \frac{c}{(t-1)\lambda} + \frac{2+c}{\lambda} \\ &\leq \frac{1}{t-1} \|\mathbf{W}^{(0)}\| + \frac{2(t-1)}{(t-1)\lambda} + \frac{(t-1)c}{(t-1)\lambda} + \sum_{t=0}^{T-1} p\beta^t \frac{2+c}{\lambda} \leq \frac{2+c}{\lambda} (1+h), \end{aligned} \quad (3)$$

where, in contrast to (Wang et al., 2011), we added the  $\|\Delta_{dupl} \mathbf{W}^{(t-1)}\|$  term equal to the norm of the duplicated weight. This term is upper bounded by  $(2+c)/\lambda$ , as the norm of any weight is upper bounded by the weight matrix norm when weight duplication is not used during training (Wang et al., 2011). The duplication probability  $p$  drops by a factor of  $\beta$  whenever the weight duplication is performed, introducing the multiplication factor of  $\sum_{t=0}^{T-1} p\beta^t$  to the total weight matrix norm degradation due to duplication, where the sum of geometric sequence of duplication probabilities is upper bounded by  $h = p/(1-\beta)$ . We then use triangle inequality to bound  $\|\mathbf{W}^{(t)} - \mathbf{W}^*\| \leq (2+c)(1+h)/\lambda + 2/\lambda$  by using the fact that  $\|\mathbf{W}^*\| \leq 2/\lambda$  according to the result in (Kivinen et al., 2002). Lastly, the third term in the r.h.s. of the inequality in (2) was obtained using function  $\mathcal{L}^{(t)}(\mathbf{W}^{(t)})$ 's  $\lambda$ -strong convexity (Shalev-Shwartz & Singer, 2007).

Dividing both sides of inequality (2) by  $2\eta^{(t)}$  and rearranging, we obtain

$$\mathcal{L}^{(t)}(\mathbf{W}^{(t)}) - \mathcal{L}^{(t)}(\mathbf{W}^*) \leq \frac{D^{(t)}}{2\eta^{(t)}} - \frac{\lambda}{2} \|\mathbf{W}^{(t)} - \mathbf{W}^*\|^2 + \frac{\eta^{(t)} \|\boldsymbol{\vartheta}^{(t)}\|^2}{2} + \frac{(2+c)(2+h)}{\lambda} \|\mathbf{E}^{(t)}\|, \quad (4)$$

Summing over all  $t$  and dividing by  $T$ , we obtain

$$\begin{aligned} \frac{1}{T} \left( \sum_{t=1}^T \mathcal{L}^{(t)}(\mathbf{W}^{(t)}) - \sum_{t=1}^T \mathcal{L}^{(t)}(\mathbf{W}^*) \right) &\leq \frac{1}{T} \sum_{t=1}^T \frac{D^{(t)}}{2\eta^{(t)}} - \frac{1}{T} \sum_{t=1}^T \frac{\lambda}{2} \|\mathbf{W}^{(t)} - \mathbf{W}^*\|^2 \\ &\quad + \frac{1}{2T} \sum_{t=1}^T \eta^{(t)} \|\boldsymbol{\theta}^{(t)}\|^2 + \frac{(2+c)(2+h)}{T\lambda} \sum_{t=1}^T \|\mathbf{E}^{(t)}\|. \end{aligned} \quad (5)$$

We bound the first and second terms in the r.h.s. of inequality (5) as

$$\begin{aligned} \frac{1}{2T} \sum_{t=1}^T \left( \frac{D^{(t)}}{\eta^{(t)}} - \lambda \|\mathbf{W}^{(t)} - \mathbf{W}^*\|^2 \right) &= \frac{1}{2T} \left( \left( \frac{1}{\eta^{(1)}} - \lambda \right) \|\mathbf{W}^{(1)} - \mathbf{W}^*\|^2 + \right. \\ &\quad \left. \sum_{t=2}^T \left( \frac{1}{\eta^{(t)}} - \frac{1}{\eta^{(t-1)}} - \lambda \right) \|\mathbf{W}^{(t)} - \mathbf{W}^*\|^2 - \frac{1}{\eta^{(T)}} \|\mathbf{W}^{(T+1)} - \mathbf{W}^*\|^2 \right) \\ &= 1 - \frac{1}{2T\eta^{(T)}} \|\mathbf{W}^{(T+1)} - \mathbf{W}^*\|^2 \leq 0. \end{aligned} \quad (6)$$

In  $=_1$ , the first and second terms vanish after plugging in  $\eta_t \equiv 1/(\lambda t)$ .

Next, we bound the third term in the r.h.s. of inequality (5) as follows,

$$\begin{aligned} \frac{1}{2T} \sum_{t=1}^T \eta^{(t)} \|\boldsymbol{\theta}^{(t)}\|^2 &= \frac{1}{2T} \sum_{t=1}^T \eta^{(t)} (\|\nabla^{(t)}\| + \|\mathbf{E}_{prune}^{(t)}\| + \|\mathbf{E}_{dupl}^{(t)}\|)^2 \\ &\leq \frac{1}{2T} \sum_{t=1}^T \frac{1}{\lambda t} \left( (2+c)(1+h) + 2+c + pt\beta^t(2+c)(1+h) \right)^2 \\ &\leq \frac{1}{2T\lambda} \sum_{t=1}^T \frac{1}{t} \left( (2+c)(2+h) + pt\beta^t(2+c)(2+h) \right)^2 \\ &= \frac{(2+c)^2(2+h)^2}{2T\lambda} \sum_{t=1}^T \frac{1}{t} (1 + pt\beta^t)^2 \\ &= \frac{(2+c)^2(2+h)^2}{2T\lambda} \left( \sum_{t=1}^T \frac{1}{t} + 2p \sum_{t=1}^T \beta^t + p^2 \sum_{t=1}^T t\beta^{2t} \right) \\ &\leq_1 \frac{(2+c)^2(2+h)^2}{2T\lambda} \left( \ln(T) + 1 + \frac{2p}{1-\beta} + \frac{p^2\beta^2}{(1-\beta^2)^2} \right) \\ &\leq \frac{(2+c)^2(2+h)^2}{2T\lambda} \left( \frac{3p}{(1-\beta)^2} + \ln(T) + 1 \right). \end{aligned} \quad (7)$$

In  $\leq_1$  we bound the terms in the parentheses according to the divergence rate of the harmonic series, as well as according to upper bounds on the sum of low-order power series.

Next, we bound the fourth term in the r.h.s. of inequality (5) as follows,

$$\begin{aligned} \frac{(2+c)(2+h)}{T\lambda} \sum_{t=1}^T \|\mathbf{E}^{(t)}\| &\leq \frac{(2+c)(2+h)}{T\lambda} \sum_{t=1}^T (\|\mathbf{E}_{prune}^{(t)}\| + \|\mathbf{E}_{dupl}^{(t)}\|) \\ &\leq \frac{(2+c)(2+h)}{T\lambda} \sum_{t=1}^T (c + pt\beta^t(2+c)(1+h)) \\ &\leq \frac{(2+c)(2+h)c}{\lambda} + \frac{(2+c)^2(2+h)^2}{T\lambda} p \sum_{t=1}^T t\beta^t \\ &\leq \frac{(2+c)^2(2+h)}{\lambda} + \frac{(2+c)^2(2+h)^2}{T\lambda} \frac{p\beta}{(1-\beta)^2}. \end{aligned} \quad (8)$$

We bounded  $\|\mathbf{E}_{prune}^{(t)}\|$  using the bound on  $\|\Delta\mathbf{W}_{prune}^{(t)}\|$ , and bounded  $\|\mathbf{E}_{dupl}^{(t)}\|$  using the bound on  $\|\mathbf{W}^{(t)}\|$ . We obtain (1) by combining inequality (5) with inequalities (6), (7), and (8).  $\square$

**Theorem 3.** *Let  $\mathcal{F}$  be a class of functions that MM can implement, and w.l.o.g.  $\|\mathbf{x}\| \leq 1$ . Then, with probability of at least  $1 - \delta$ , the risk of any function  $f \in \mathcal{F}$  is bounded from above as*

$$R(f) \leq \tilde{R}_N(f) + \frac{4 + 4K\|\mathbf{W}\|}{\sqrt{N}} + (\|\mathbf{W}\| + 1)\sqrt{\frac{\ln \frac{1}{\delta}}{2N}}, \quad (9)$$

where  $K = \sum_{i=1}^M b_i \sum_{j \neq i}^M b_j$ , and  $b_i$  is the number of weights for the  $i^{\text{th}}$  class.

*Proof.* The proof closely follows the proof of Theorem 6 from (Guermeur, 2010). For the clarity of notation, we introduce  $f_i(\mathbf{x}) = g(i, \mathbf{x}) = \max_j \mathbf{w}_{i,j}^T \mathbf{x}$ , and  $f_{i,j} = \mathbf{w}_{i,j}^T \mathbf{x}$ ,  $i \in \{1, \dots, M\}$ ,  $j \in \{1, \dots, b_i\}$ . Then, let  $\bar{\mathcal{F}}$  stand for the product space  $\mathcal{F}^M$ , so that  $(f_1(\cdot), \dots, f_M(\cdot)) \in \bar{\mathcal{F}}$ . Additionally, in order to retain the generality of the Theorem and its proof, in the following we use  $\kappa$  to denote a kernel function as in (Guermeur, 2010), and  $\Phi(\mathbf{x})$  to denote a kernel mapping from the original input space to the feature space induced by the kernel function  $\kappa$ . However, note that the MM model, although being non-linear classifier, uses a linear kernel to compare each weight  $\mathbf{w}_{i,j}$  to a new data point, and in the following we can also set  $\Phi(\mathbf{x}) = \mathbf{x}$ . Further, let  $\|\mathbf{w}\|_\infty \leq \Lambda_w$  and let  $\forall \mathbf{x} \in \mathbb{R}^D, \|\mathbf{x}\| \leq \Lambda_{\Phi(\mathbb{R}^D)}$ .

It follows,

$$\forall \bar{f} \in \bar{\mathcal{F}}, R(\bar{f}) \leq \tilde{R}(\bar{f}). \quad (10)$$

Consequently,

$$\forall \bar{f} \in \bar{\mathcal{F}}, R(\bar{f}) \leq \tilde{R}_N(\bar{f}) + \sup_{\bar{f} \in \bar{\mathcal{F}}} (\tilde{R}(\bar{f}) - \tilde{R}_N(\bar{f})). \quad (11)$$

The rest of the proof consists in the computation of an upper bound on the supremum of the empirical process appearing in (11). Let  $Z$  denote a random pair  $(X, Y)$  and  $Z_i$  its copies which constitute the  $N$ -sample  $D_N : D_N = (Z_i)_{1 \leq i \leq N}$ . After simplifying notation this way, the bounded differences inequality can be applied to the supremum of interest by setting  $n = N$ ,  $(T_i)_{1 \leq i \leq n} = D_N$  (i.e.,  $T_i = Z_i$ ), and  $f(T_1, \dots, T_n) = \sup_{\bar{f} \in \bar{\mathcal{F}}} (\tilde{R}(\bar{f}) - \tilde{R}_N(\bar{f}))$ . The functions  $\bar{f} \in \bar{\mathcal{F}}$  take their values in the interval  $[-B_{\bar{\mathcal{F}}}, B_{\bar{\mathcal{F}}}]^M$ , with  $B_{\bar{\mathcal{F}}} = \Lambda_w \Lambda_{\Phi(X)}$ . Consequently, the loss function associated with the risk  $\tilde{R}$  takes its values in the interval  $[0, K_{\bar{\mathcal{F}}}]$ . We can then get the following result (Guermeur, 2010): With probability of at least  $1 - \delta$ ,

$$\sup_{\bar{f} \in \bar{\mathcal{F}}} (\tilde{R}(\bar{f}) - \tilde{R}_N(\bar{f})) \leq \mathbb{E}_{D_N} \sup_{\bar{f} \in \bar{\mathcal{F}}} (\tilde{R}(\bar{f}) - \tilde{R}_N(\bar{f})) + K_{\bar{\mathcal{F}}} \sqrt{\frac{\ln(\frac{1}{\delta})}{2N}}. \quad (12)$$

Further, it can be shown that

$$\mathbb{E}_{D_N} \sup_{\bar{f} \in \bar{\mathcal{F}}} (\tilde{R}(\bar{f}) - \tilde{R}_N(\bar{f})) \leq 4 \left( \frac{1}{\sqrt{N}} + \mathbb{E}_{\sigma, D_N} \left[ \sup_{\bar{f} \in \bar{\mathcal{F}}} \frac{1}{N} \left| \sum_{i=1}^N \sigma_i \frac{1}{2} \left( \bar{f}_{Y_i}(X_i) - \max_{k \neq Y_i} \bar{f}_k(X_i) \right) \right| \right] \right). \quad (13)$$

In order to address the specific case of the considered MM model, we will introduce a different definition of *cat* than in the proof of Theorem 6 in (Guermeur, 2010). For  $n \in \mathbb{N}^*$ , let  $z^n = ((x_i, y_i))_{1 \leq i \leq n} \in (\mathbb{R}^D \times \mathcal{Y})^n$  and let *cat* be a mapping from  $\bar{\mathcal{F}} \times \mathbb{R}^D \times \mathcal{Y}$  into  $\{1, \dots, M\}^2 \times \mathbb{N}^2$  such that

$$\begin{aligned} \forall (\bar{f}, x, y) \in \bar{\mathcal{F}} \times \mathbb{R}^D \times \mathcal{Y}, \text{cat}(\bar{f}, \mathbf{x}, y) = (k, l, p, q) \Rightarrow & (k = y) \wedge (l \neq y) \wedge \left( \bar{f}_l(\mathbf{x}) = \max_{i \neq y} \bar{f}_i(\mathbf{x}) \right) \\ & \wedge (p = \arg \max_j \mathbf{w}_{k,j}^T \mathbf{x}) \wedge (q = \arg \max_j \mathbf{w}_{l,j}^T \mathbf{x}). \end{aligned} \quad (14)$$

The rest of the proof is straightforward modification of the proof of Theorem 6 in (Guermeur, 2010). By construction of

the mapping  $cat$ ,

$$\begin{aligned}
 \forall z^N \in (\mathbb{R}^D \times \mathcal{Y})^N, \frac{1}{2} \mathbb{E}_\sigma \left[ \sup_{\bar{f} \in \bar{\mathcal{F}}} \left| \sum_{i=1}^N \sigma_i \left( \bar{f}_{y_i}(\mathbf{x}_i) - \max_{k \neq y_i} \bar{f}_k(\mathbf{x}_i) \right) \right| \right] \\
 \leq \frac{1}{2} \mathbb{E}_\sigma \left[ \sup_{\bar{f} \in \bar{\mathcal{F}}} \left| \sum_{k \neq l, p, q} \sum_{i: cat(\bar{f}, \mathbf{x}, y) = (k, l, p, q)} \sigma_i (\bar{f}_{k,p}(\mathbf{x}_i) - \bar{f}_{l,q}(\mathbf{x}_i)) \right| \right] \\
 \leq \Lambda_w \mathbb{E}_\sigma \left[ \sup_{\bar{f} \in \bar{\mathcal{F}}} \sum_{k \neq l, p, q} \left\| \sum_{i: cat(\bar{f}, \mathbf{x}, y) = (k, l, p, q)} \sigma_i \kappa(\mathbf{x}_i, \cdot) \right\| \right].
 \end{aligned} \tag{15}$$

Then, let  $\Pi_N$  be the set of all mappings  $\pi_N$  from  $\{1, \dots, N\}$  into  $(k, l, p, q) \in \{1, \dots, M\}^2 \times \mathbb{N}^2$ , such that for all values of  $i$ , the pair  $(k, l)$  is always made up of two different values, while  $p \in \{1, \dots, b_k\}$  and  $q \in \{1, \dots, b_l\}$ . It follows

$$\Lambda_w \mathbb{E}_\sigma \left[ \sup_{\bar{f} \in \bar{\mathcal{F}}} \sum_{k \neq l, p, q} \left\| \sum_{i: cat(\bar{f}, \mathbf{x}, y) = (k, l, p, q)} \sigma_i \kappa(\mathbf{x}_i, \cdot) \right\| \right] \leq \Lambda_w \sum_{k \neq l, p, q} \mathbb{E}_\sigma \left[ \sup_{\pi_N \in \Pi_N} \left\| \sum_{i: \pi_N = (k, l, p, q)} \sigma_i \kappa(\mathbf{x}_i, \cdot) \right\| \right]. \tag{16}$$

Consequently, to complete the derivation of the bound, it suffices to find a uniform upper bound on the expressions of the form

$$\mathbb{E}_\sigma \left\| \sum_{i \in \mathcal{I}_N} \sigma_i \kappa(\mathbf{x}_i, \cdot) \right\|, \tag{17}$$

where  $\mathcal{I}_N$  is a subset of  $\{1, \dots, N\}$ . By applying Jensen's inequality and using the fact that  $\kappa(\mathbf{x}_i, \mathbf{x}_i) \geq 0$ , a uniform upper bound of the above expression can be shown to be equal to

$$\mathbb{E}_\sigma \left\| \sum_{i \in \mathcal{I}_N} \sigma_i \kappa(\mathbf{x}_i, \cdot) \right\| \leq \Lambda_{\Phi(\mathbb{R}^D)} \sqrt{N}. \tag{18}$$

By substitution in the right-hand side of (16), and then in the right-hand side of (15), we get

$$\forall z^N \in (\mathbb{R}^D \times \mathcal{Y})^N, \frac{1}{2} \mathbb{E}_\sigma \left[ \sup_{\bar{f} \in \bar{\mathcal{F}}} \left| \sum_{i=1}^N \sigma_i \left( \bar{f}_{y_i}(\mathbf{x}_i) - \max_{k \neq y_i} \bar{f}_k(\mathbf{x}_i) \right) \right| \right] \leq K \Lambda_w \Lambda_{\Phi(\mathbb{R}^D)} \sqrt{N}, \tag{19}$$

where  $K = \sum_{i=1}^M b_i \sum_{j \neq i}^M b_j$ , which implies that

$$\frac{1}{2} \mathbb{E}_{\sigma, D_N} \left[ \sup_{\bar{f} \in \bar{\mathcal{F}}} \frac{1}{N} \left| \sum_{i=1}^N \sigma_i \left( \bar{f}_{y_i}(\mathbf{x}_i) - \max_{k \neq y_i} \bar{f}_k(\mathbf{x}_i) \right) \right| \right] \leq \frac{K \Lambda_w \Lambda_{\Phi(\mathbb{R}^D)}}{\sqrt{N}}. \tag{20}$$

In the case of MM, it is easy to see that  $K_{\bar{\mathcal{F}}} = 1 + \Lambda_w \Lambda_{\Phi(\mathbb{R}^D)}$ . Also, due to the assumptions of the Theorem, we can set  $\Lambda_{\Phi(\mathbb{R}^D)} = 1$  and  $\Lambda_w = \|\mathbf{W}\|$ . Finally, combining inequalities (11), (12), (13), and (20) produces the bound (9), which concludes the proof.

As a concluding remark, we note that the main difference between proofs of Theorem 6 from (Guermeur, 2010) and the proof of Theorem 4 is in the definition of  $cat$  mapping. Unlike in (Guermeur, 2010), where the image of  $cat$  mapping is of cardinality  $M \cdot (M - 1)$ , the image of  $cat$  mapping for MM is of cardinality  $K$ , due to a larger number of weights per class.  $\square$

## References

Guermeur, Y. Sample complexity of classifiers taking values in  $\mathbb{R}^Q$ , application to multi-class SVMs. *Communications in Statistics - Theory and Methods*, 39(3):543–557, 2010.

Kivinen, J., Smola, A. J., and Williamson, R. C. Online learning with kernels. *IEEE Transactions on Signal Processing*, 52(8):2165–2176, 2002.

Shalev-Shwartz, S. and Singer, Y. Logarithmic regret algorithms for strongly convex repeated games (Technical Report). The Hebrew University, 2007.

Wang, Z., Djuric, N., Crammer, K., and Vucetic, S. Trading representability for scalability: Adaptive multi-hyperplane machine for nonlinear classification. In *ACM SIGKDD Conference on Knowledge Discovery and Data Mining*, 2011.
